# Supplementary material for: Sea-urchin-like iron-cobalt phosphide as an advanced anode material for lithium ion batteries
Source: Royal Society of Chemistry journal article supplement (doi:10.1039/d2ma00610c), 2022-01-01
Supplement: d2ma00610c1.pdf [file d2ma00610c1.pdf]

## Supplementary Information

### Sea-Urchin-like Iron-Cobalt Phosphide as Advanced Anode Material for Lithium Ion Battery

Prakash Kumar Pathak,<sup>†,a</sup> Ved Prakash Joshi,<sup>†,a</sup> Nitish Kumar,<sup>a</sup> and Rahul R Salunkhe<sup>a,\*</sup>

<sup>a</sup>*Materials Research Laboratory, Department of Physics, Indian Institute of Technology Jammu, Jammu and Kashmir, India (181121).*

<sup>†</sup>These authors contributed equally to this work.

\*Email: [rahul.salunkhe@iitjammu.ac.in](mailto:rahul.salunkhe@iitjammu.ac.in)

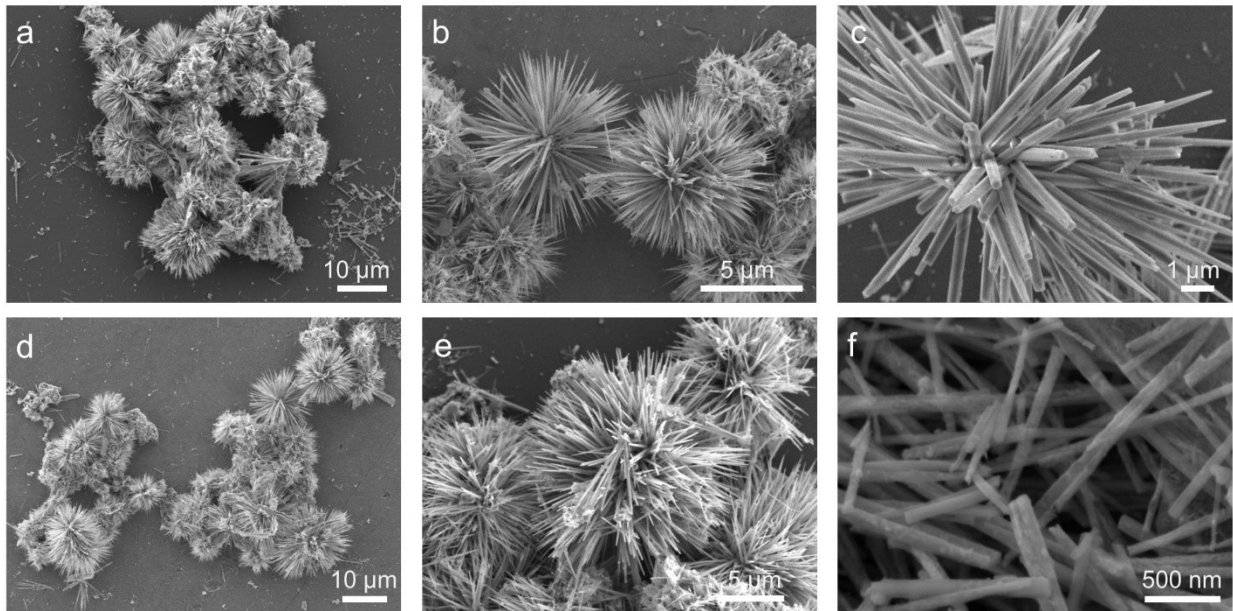

**Fig. S1.** FESEM images of the before and after phosphorization. (a-c) As-synthesized  $\text{FeCo}(\text{CO}_3)_2\text{OH}$  after hydrothermal reaction and (d-f)  $\text{FeCoP}$  after phosphorization at 300 °C under the flow of  $\text{N}_2$ .

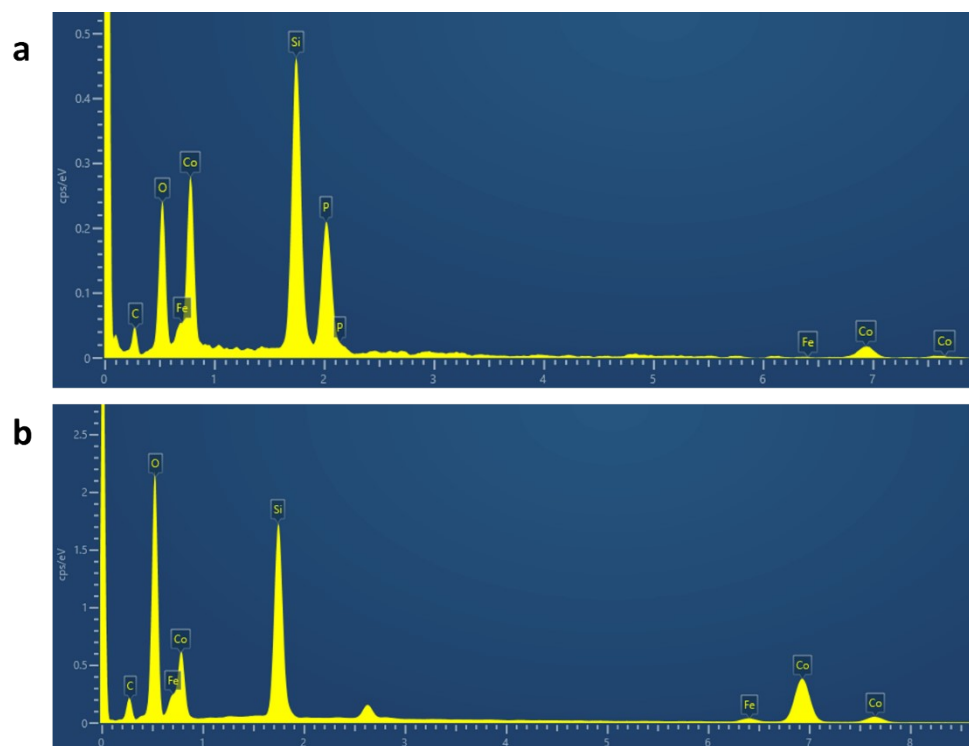

**Fig. S2.** EDS mapping before and after phosphorization. (a) the signal from  $\text{FeCo}(\text{CO}_3)_2\text{OH}$ , (b) the signal from  $\text{FeCoP}$ .

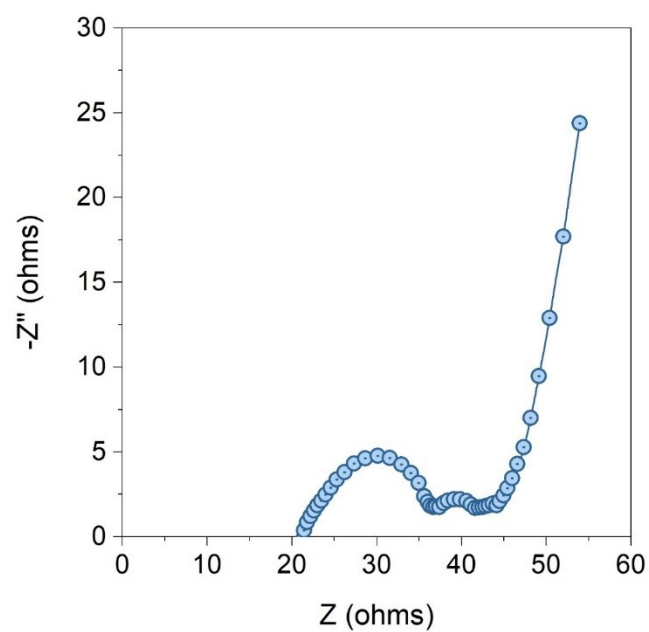

**Fig. S3.** EIS measurement of the device after 150<sup>th</sup> cycle showing the decreased charge transfer resistance ( $R_{ct}$ ).

**Table S1.** FeCoP half-cell comparison with previously reported transition metal phosphides.

| S.No | Material                 | Voltage window (V) | Electrolyte                                                                                          | Discharge Capacity (mAh g <sup>-1</sup> ) @ current rate | Ref.      |
|------|--------------------------|--------------------|------------------------------------------------------------------------------------------------------|----------------------------------------------------------|-----------|
| 1.   | CoP/graphene             | 0-3                | 1 M LiPF <sub>6</sub> in a mixture of EC: EMC: DMC <sup>‡</sup> in the ratio of 1: 1: 1              | 1154 @ 100 mA g <sup>-1</sup>                            | 1         |
| 2.   | CoP@GA <sup>‡</sup>      | 0-3                | 1 M LiPF <sub>6</sub> in a mixture EC: DEC (1: 1 v/v)                                                | 1032.2 @ 100 mA g <sup>-1</sup>                          | 2         |
| 3.   | CoP@GF <sup>‡</sup>      | 0-3                | 1 M LiPF <sub>6</sub> in a mixture of DMC: DEC: EC (1:1:1 vol%)                                      | 1120 @ 100 mA g <sup>-1</sup>                            | 3         |
| 4.   | CoP/NC <sup>‡</sup>      | 0-3                | 1 M LiPF <sub>6</sub> in a mixture of EC/DMC (1: 1, v/v)                                             | ~800 @ 50 mA g <sup>-1</sup>                             | 4         |
| 5.   | Co <sub>2</sub> P        | 0-3                | 1 M LiPF <sub>6</sub> in a mixture of EC/DMC (1: 1, v/v)                                             | 780 @ 0.2 C                                              | 5         |
| 6.   | CuP <sub>2</sub>         | 0.02–2.5           | LiPF <sub>6</sub> -based electrolyte                                                                 | 865 @ 100 mA g <sup>-1</sup>                             | 6         |
| 7.   | CoP/RGO <sup>‡</sup>     | 0.005-3            | 1 M LiPF <sub>6</sub> in a mixture of EC/DEC (1: 1, v/v)                                             | 1,274 @ 100 mA g <sup>-1</sup>                           | 7         |
| 8.   | CoP@S <sup>‡</sup>       | 1.8-2.8            | 0.2 M Li <sub>2</sub> S <sub>6</sub> +1M LiTFSI in 1,3-dioxolane and dimethoxyethane (1:1 in volume) | 1020 @ 0.2 C                                             | 8         |
| 9.   | Co <sub>x</sub> P-NC-800 | 0-3                | 1 M LiPF <sub>6</sub> in a mixture of EC/DEC (1: 1, v/v)                                             | 1224 @100 mA g <sup>-1</sup>                             | 9         |
| 10   | CoP@3DC <sup>‡</sup>     | 1.7–2.8            | 1 M LiTFSI in a DOL/DOM (v/v = 1:1)                                                                  | 1161.79 @ 0.2 C                                          | 10        |
| 11   | FeCoP <sup>‡</sup>       | 0-3                | 1 M LiPF <sub>6</sub> in a mixture of EC/DMC (1: 1, v/v)                                             | 1653.4 @ 100 mA g <sup>-1</sup>                          | This work |

<sup>‡</sup>Note: **EC:EMC:DMC**- Ethylene carbonate: ethylene methyl carbonate: dimethyl carbonate; **RGO**- Reduced graphene oxide; **GA**- graphene aerogel; **GF**- graphene framework membrane; **NC**- nitrogen-doped carbon; **S**-Sulfur; **3DC**- three-dimensional carbon frame embedded; **CoP**-Cobalt phosphide.

| <i>XPS Analysis</i>                  |                                                       |                                                         |                                                         |                                                          |
|--------------------------------------|-------------------------------------------------------|---------------------------------------------------------|---------------------------------------------------------|----------------------------------------------------------|
| Sample                               | Element                                               | Binding energy (eV)                                     |                                                         | Atomic percentage (%)                                    |
| FeCoP                                |                                                       |                                                         |                                                         |                                                          |
|                                      | P                                                     | 133.75                                                  |                                                         | 11.4                                                     |
|                                      | C                                                     | 284.8                                                   |                                                         | 25.46                                                    |
|                                      | O                                                     | 531.1                                                   |                                                         | 44.68                                                    |
|                                      | Fe                                                    | 710.91                                                  |                                                         | 9.16                                                     |
|                                      | Co                                                    | 781.1                                                   |                                                         | 9.3                                                      |
| <i>BET surface area measurements</i> |                                                       |                                                         |                                                         |                                                          |
| Material                             | S <sub>BET</sub><br>(m <sup>2</sup> g <sup>-1</sup> ) | S <sub>micro</sub><br>(m <sup>2</sup> g <sup>-1</sup> ) | V <sub>pore</sub><br>(cm <sup>3</sup> g <sup>-1</sup> ) | V <sub>micro</sub><br>(cm <sup>3</sup> g <sup>-1</sup> ) |
| FeCoP                                | 29.3                                                  | 0                                                       | 0.034                                                   | 0                                                        |
| <i>Half cell performance</i>         |                                                       |                                                         |                                                         |                                                          |
|                                      |                                                       | Current density<br>(mA g <sup>-1</sup> )                | Specific discharge capacity<br>(mAh g <sup>-1</sup> )   |                                                          |
|                                      |                                                       | 100                                                     | 1653.4                                                  |                                                          |
|                                      |                                                       | 400                                                     | 1091.2                                                  |                                                          |
|                                      |                                                       | 500                                                     | 1030.4                                                  |                                                          |
|                                      |                                                       | 600                                                     | 884.2                                                   |                                                          |
|                                      |                                                       | 700                                                     | 881.0                                                   |                                                          |
|                                      |                                                       | 1000                                                    | 820.8                                                   |                                                          |
|                                      |                                                       | 5000                                                    | 380.1                                                   |                                                          |

**Table S2.** Data summary for this work.

## References

- 1 Y. Yang, Y. Jiang, W. Fu, X. Z. Liao, Y. S. He, W. Tang, F. M. Alamgir and Z. F. Ma, *Dalt. Trans.*, 2019, **48**, 7778–7785.
- 2 H. Gao, F. Yang, Y. Zheng, Q. Zhang, J. Hao, S. Zhang, H. Zheng, J. Chen, H. Liu and Z. Guo, *ACS Appl. Mater. Interfaces*, 2019, **11**, 5373–5379.
- 3 J. Wang, G. Zhu, Z. Zhang, Y. Wang, H. Wang, J. Bai and G. Wang, *Chem. Eur. J.*, 2021, **27**, 1713–1723.
- 4 K. Zhu, J. Liu, S. Li, L. Liu, L. Yang, S. Liu, H. Wang and T. Xie, *Adv. Mater. Interfaces*, 2017, **4**, 1700377.
- 5 D. Yang, J. Zhu, X. Rui, H. Tan, R. Cai, H. E. Hoster, D. Y. W. Yu, H. H. Hng and Q. Yan, *ACS Appl. Mater. Interfaces*, 2013, **5**, 1093–1099.
- 6 G. A. Li, C. Y. Wang, W. C. Chang and H. Y. Tuan, *ACS Nano*, 2016, **10**, 8632–8644.
- 7 J. Yang, Y. Zhang, C. Sun, H. Liu, L. Li, W. Si, W. Huang, Q. Yan and X. Dong, *Nano Res.*, 2016, **9**, 612–621.
- 8 C. Qi, Z. Li, C. Sun, C. Chen, J. Jin and Z. Wen, *ACS Appl. Mater. Interfaces*, 2020, **12**, 49626–49635.
- 9 G. Xia, J. Su, M. Li, P. Jiang, Y. Yang and Q. Chen, *J. Mater. Chem. A*, 2017, **5**, 10321–10327.
- 10 Y. Luo, Y. Fan, S. Wang, Q. Chen, A. Ali, J. Zhu and P. Kang Shen, *J. Electroanal. Chem.*, 2022, **912**, 116202.
